# Supplementary material for: Comparative effects of different sugar substitutes: Mogroside V, stevioside, sucralose, and erythritol on intestinal health in a type 2 diabetes mellitus mouse
Source: Royal Society of Chemistry journal article supplement (doi:10.1039/d4fo04446k), 2025-01-01

### OCCLUDIN-1

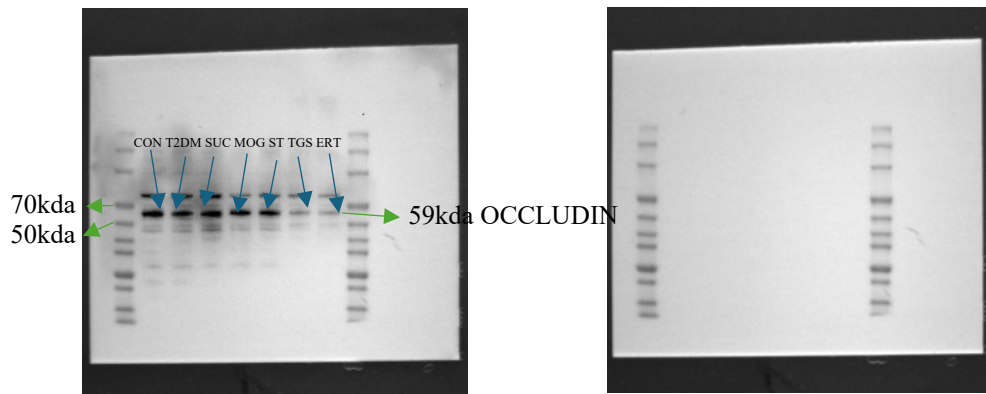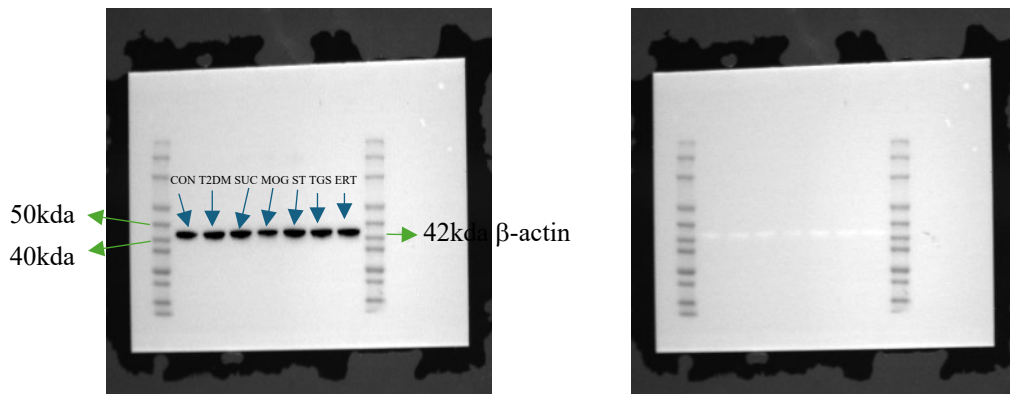

### OCCLUDIN-2

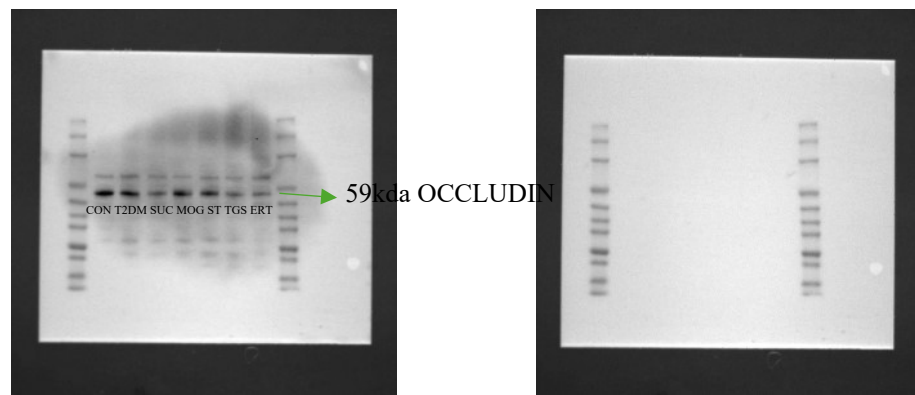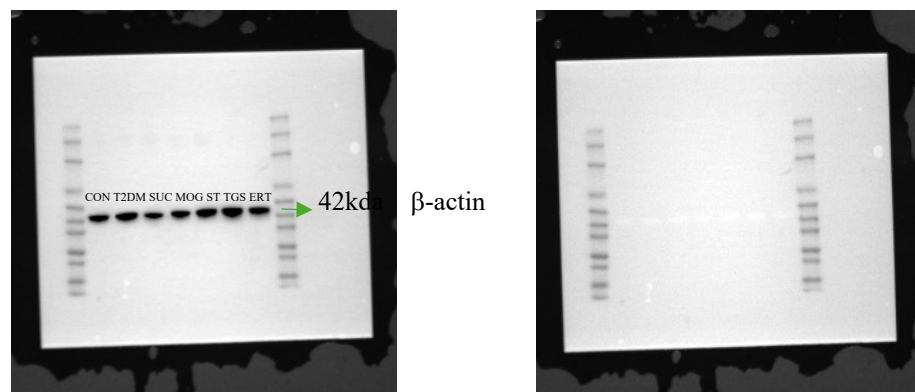

### OCCLUDIN-3

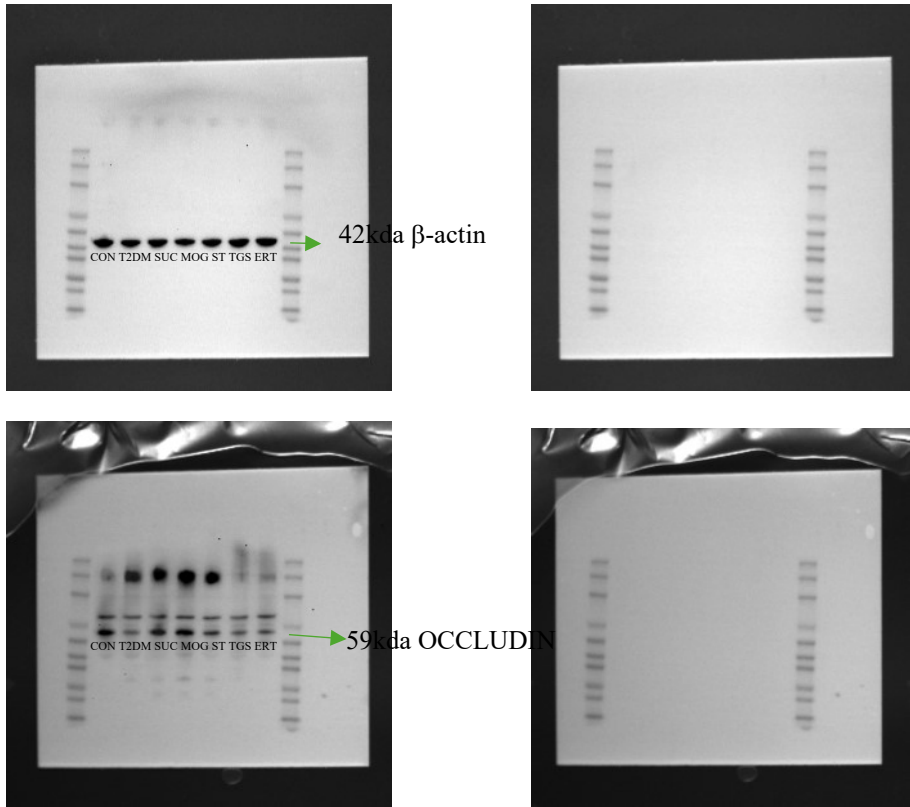

### MUC2-1

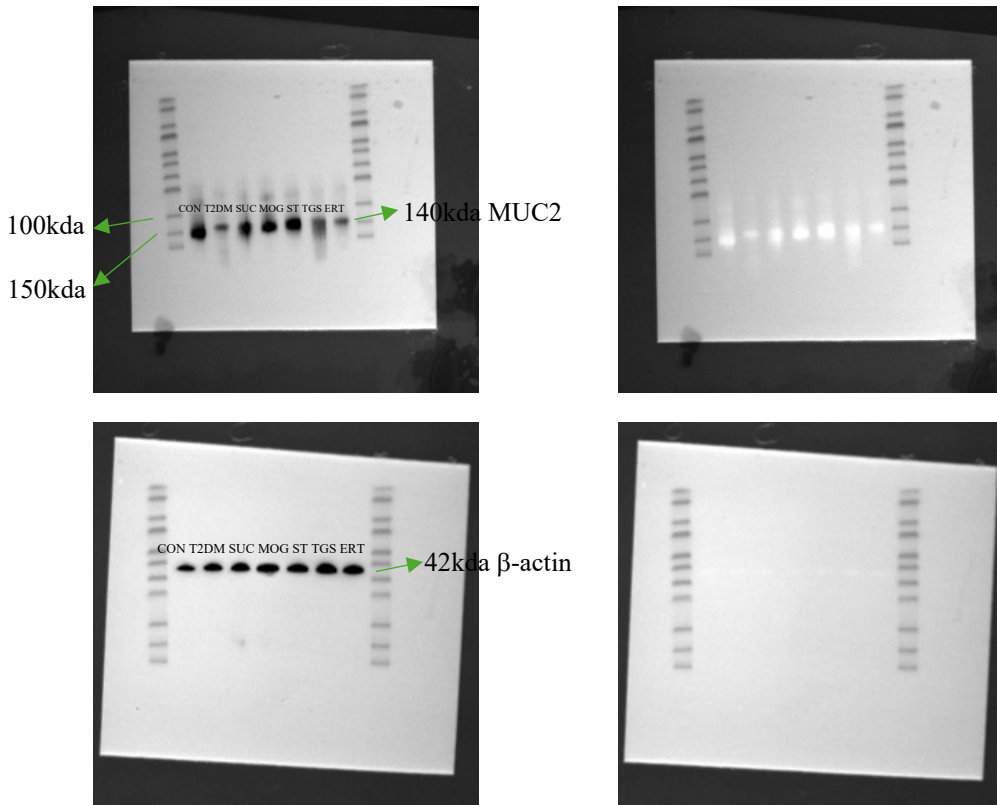

MUC2-2

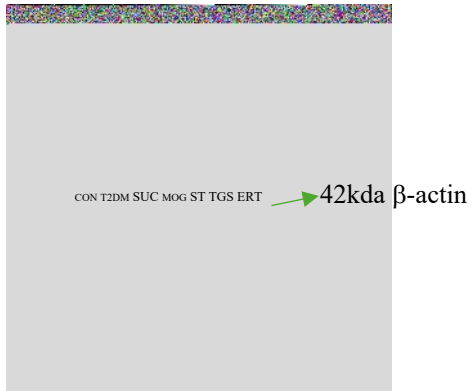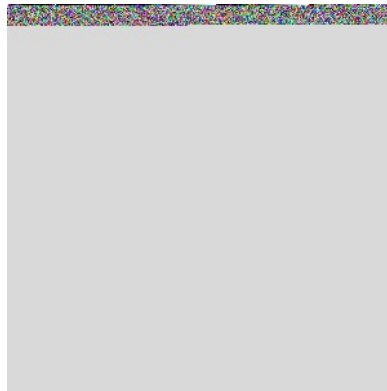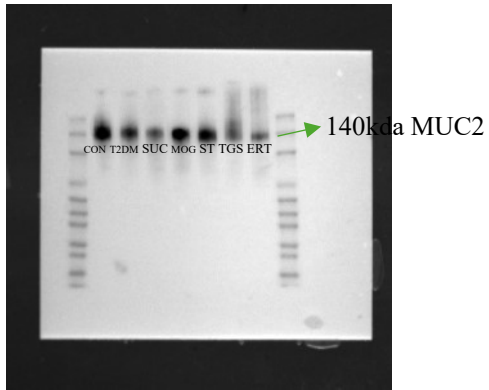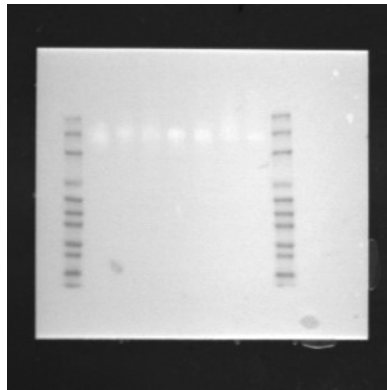

MUC2-3

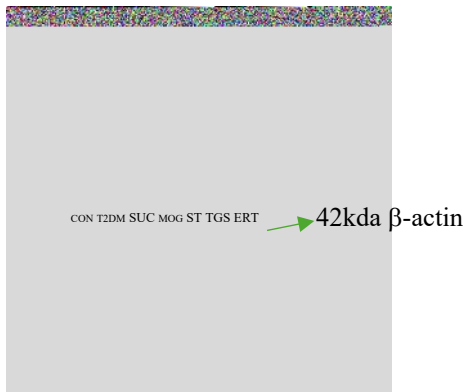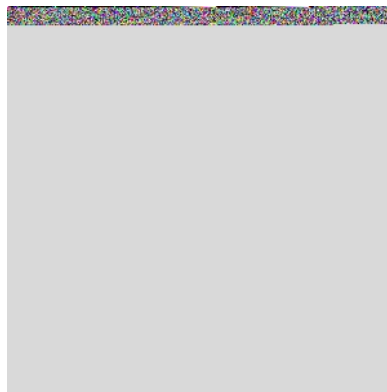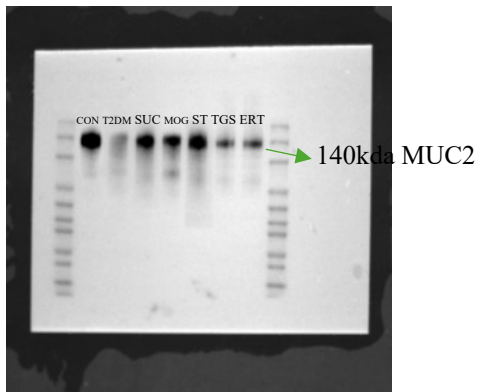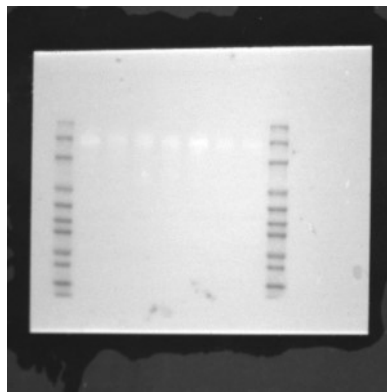

NF-κB-1

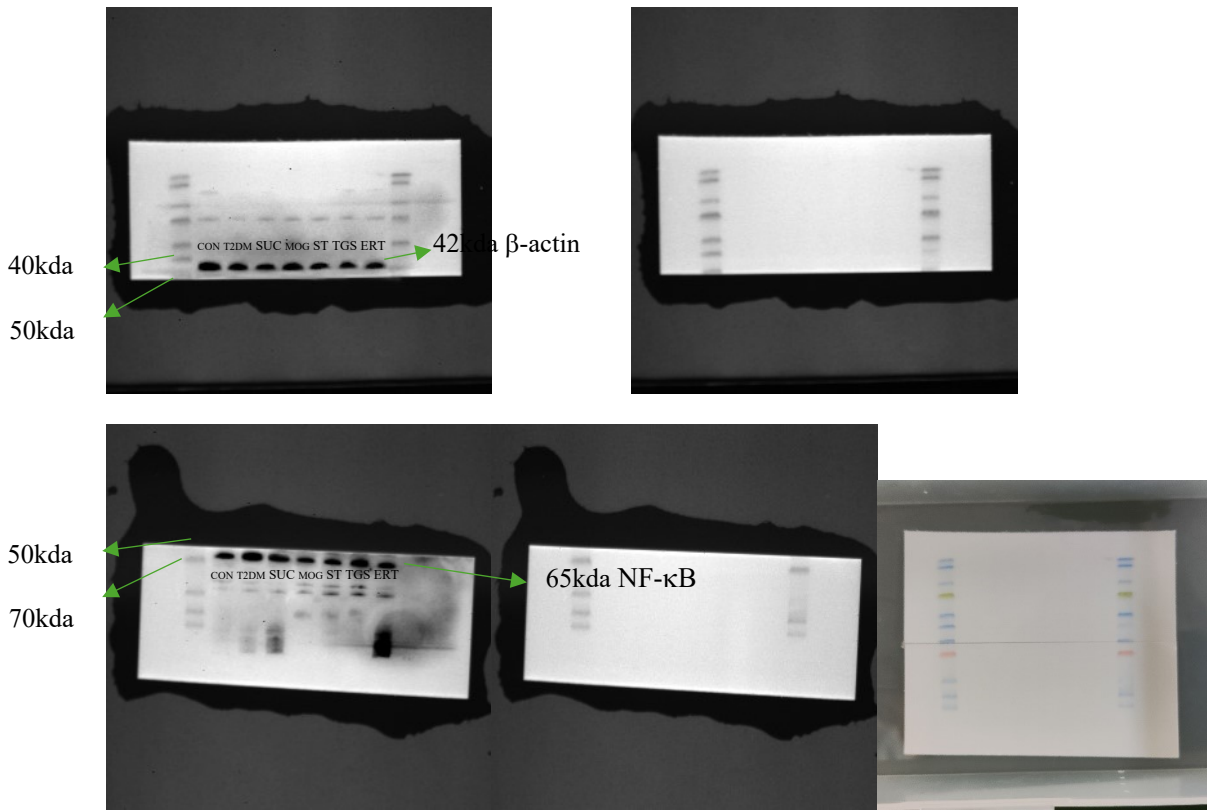

NF-κB-2

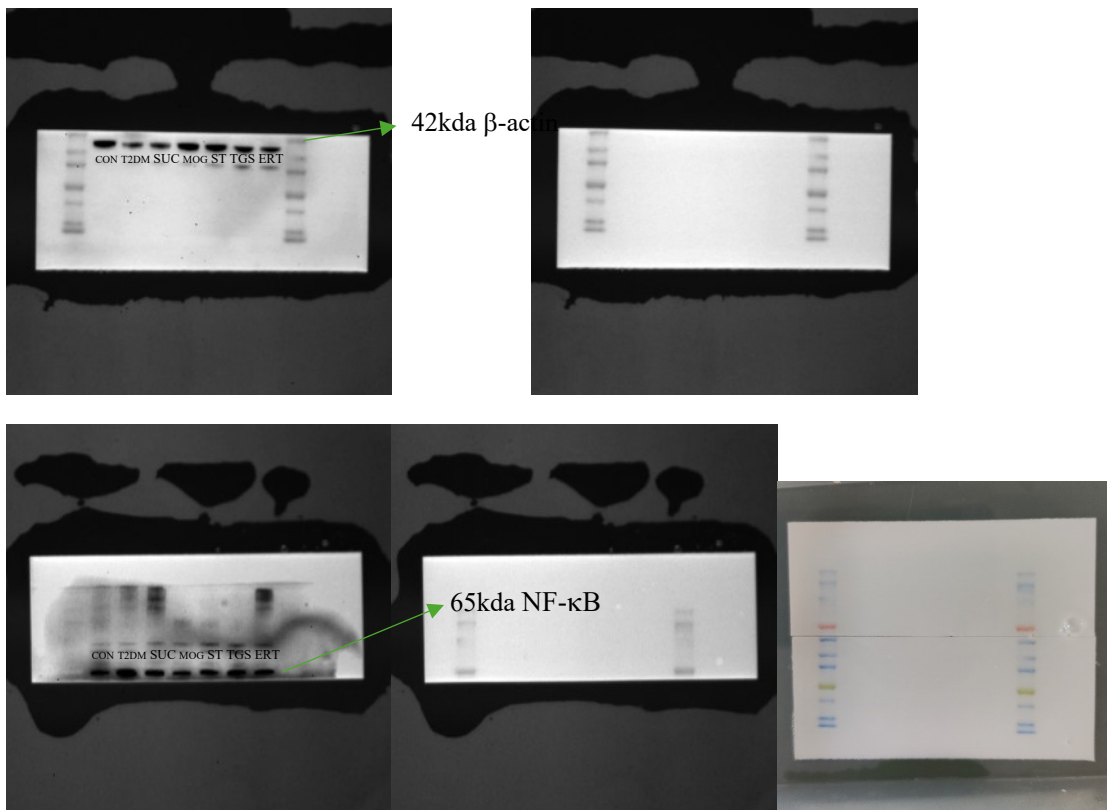

NF- $\kappa$ B-3

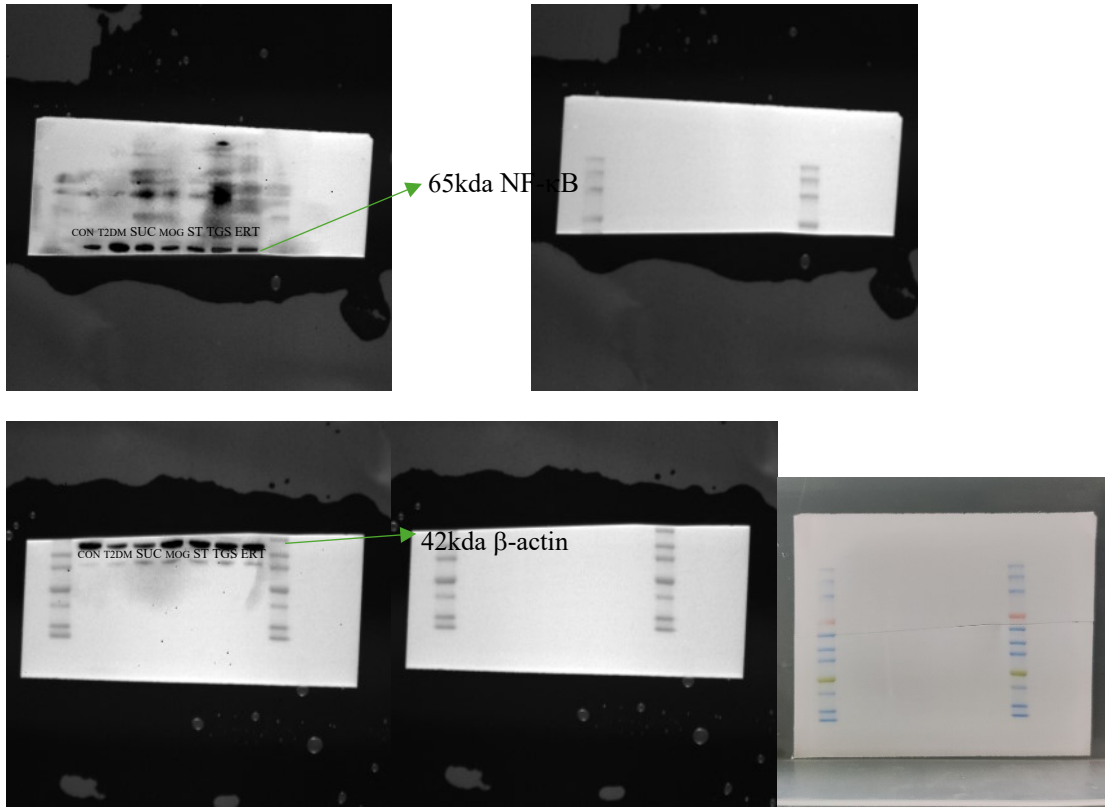

PI3K-1

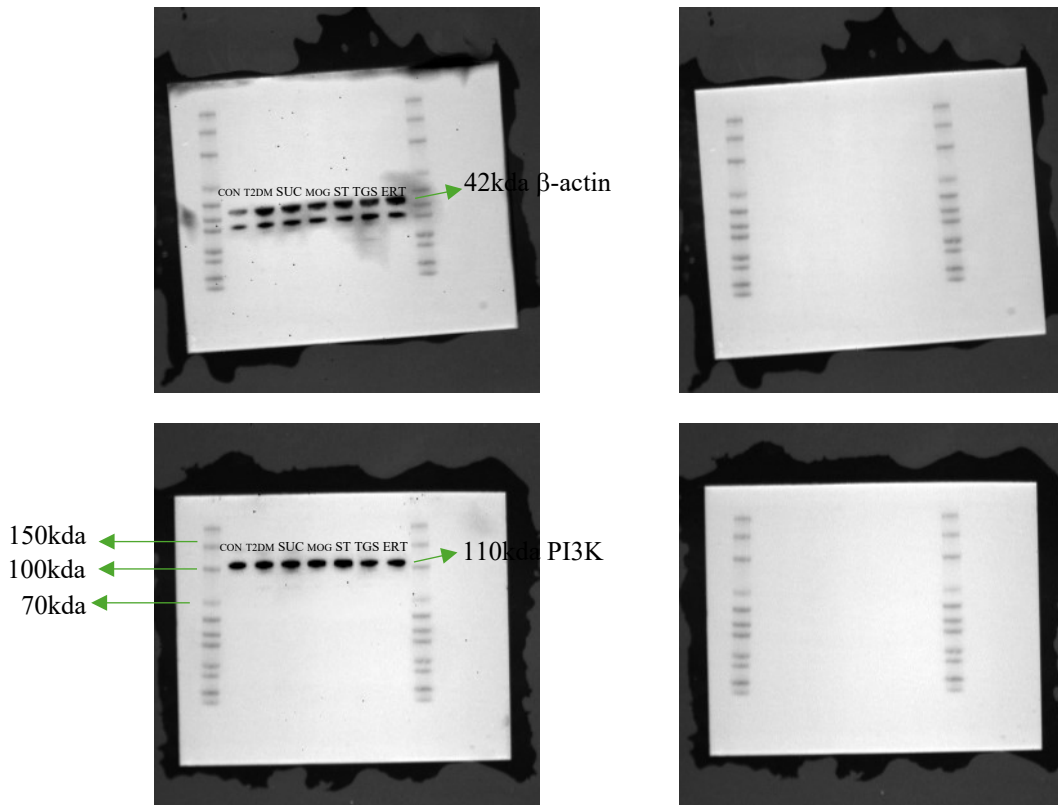

PI3K-2

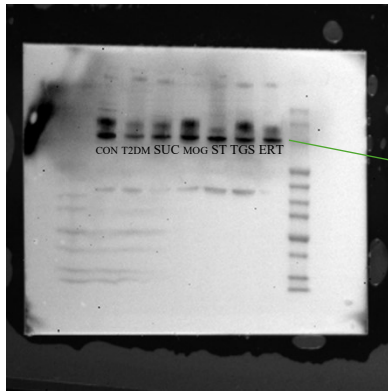

110kda PI3K

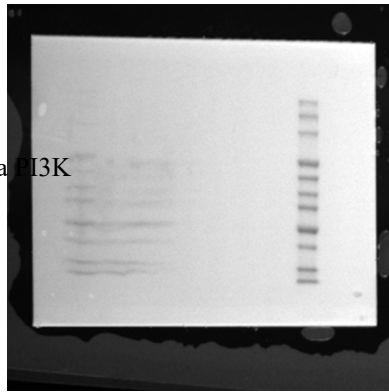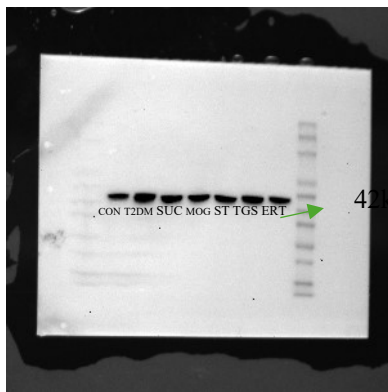

42kda  $\beta$ -actin

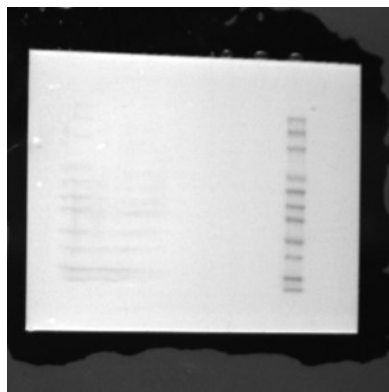

PI3K-3

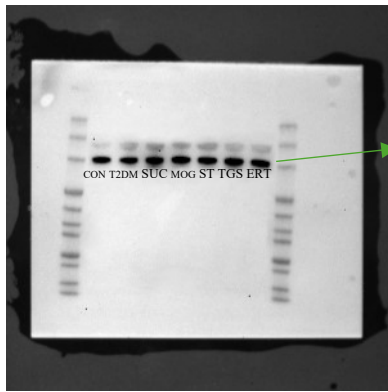

110kda PI3K

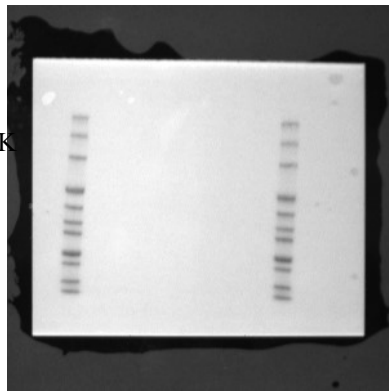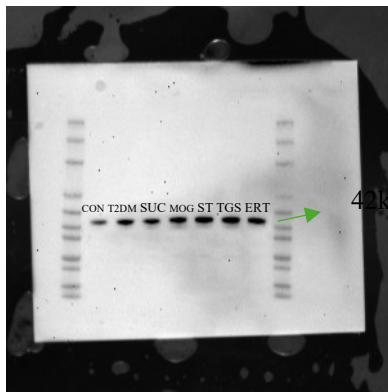

42kda  $\beta$ -actin

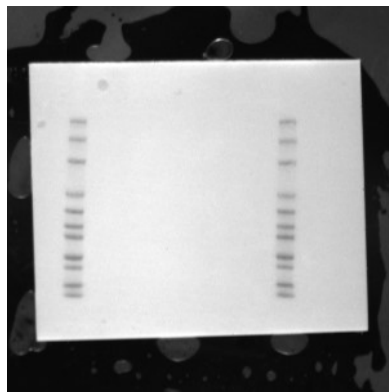

AKT-1

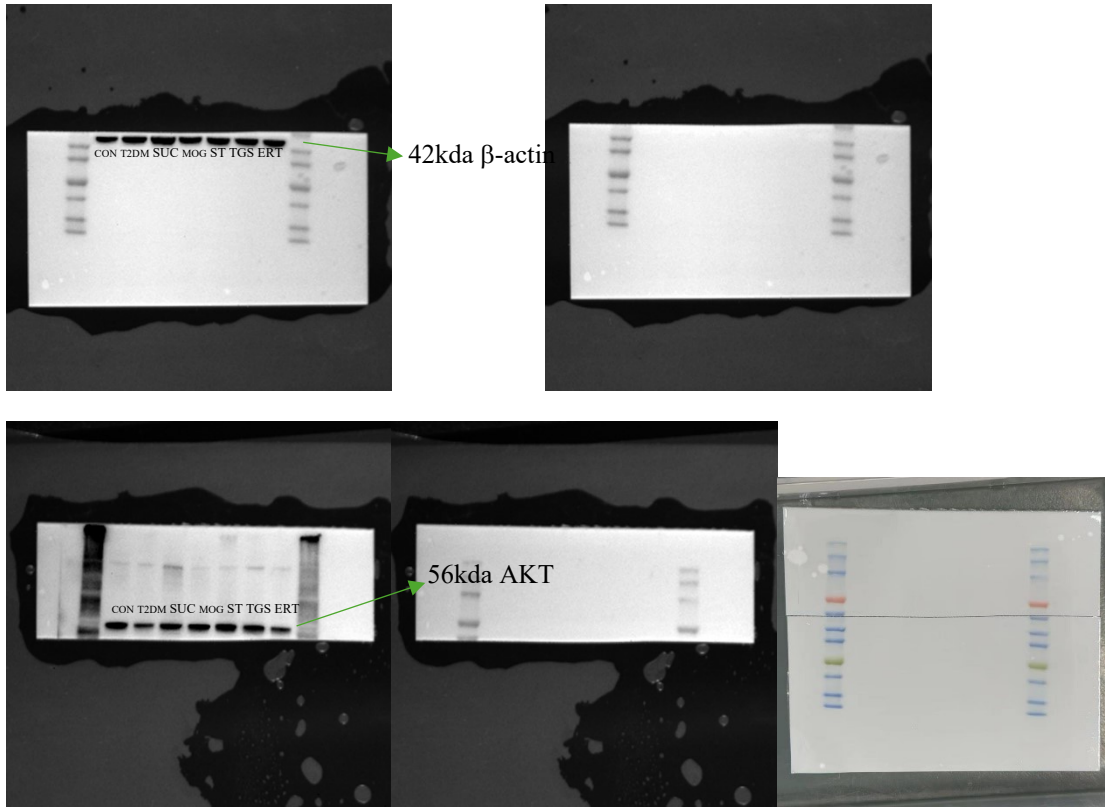

AKT-2

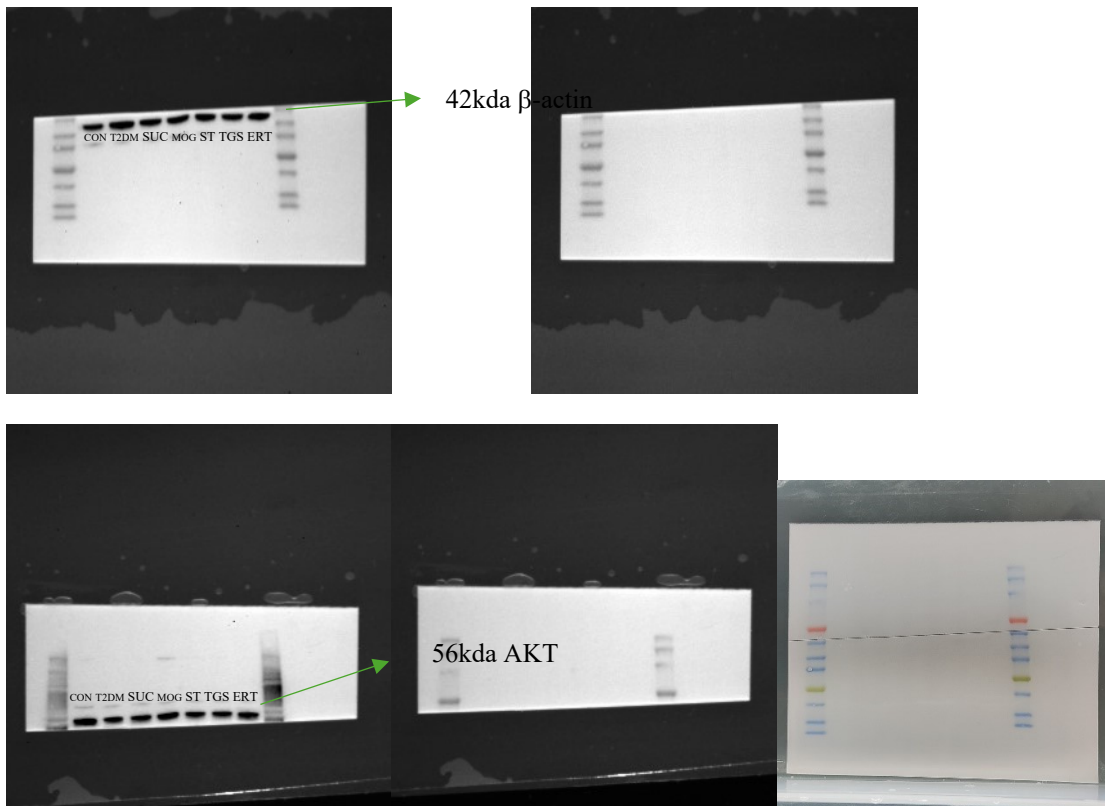

AKT-3

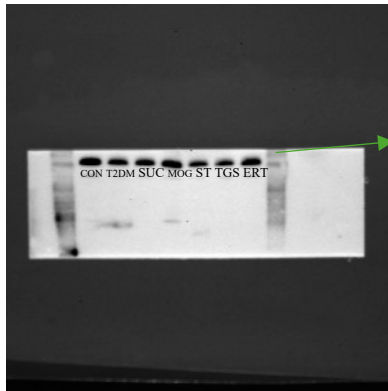

56kda AKT

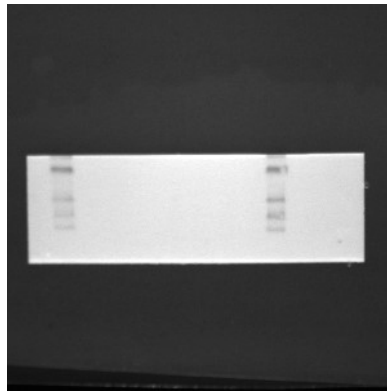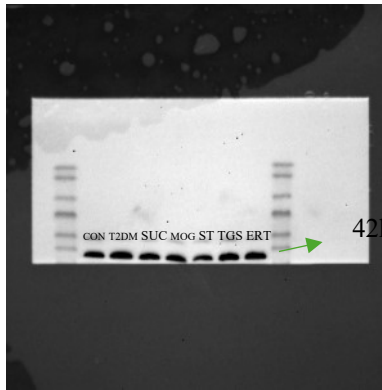

42kda  $\beta$ -actin

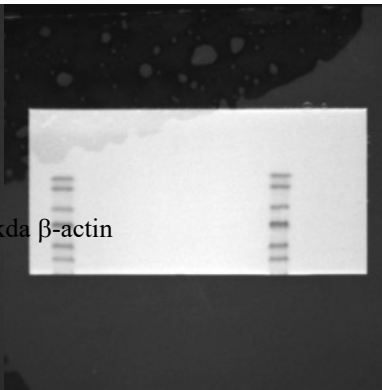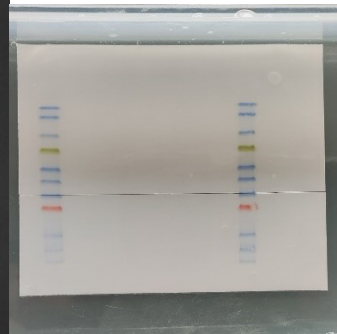

Supplement: d4fo04446k2.pdf [file d4fo04446k2.pdf]
