# Supplementary material for: Comparative effects of different sugar substitutes: Mogroside V, stevioside, sucralose, and erythritol on intestinal health in a type 2 diabetes mellitus mouse
Source: Royal Society of Chemistry journal article supplement (doi:10.1039/d4fo04446k), 2025-01-01
Supplement: d4fo04446k1.xlsx [file d4fo04446k1.xlsx]

## Sheet: Physiological indexes
GROUP	WEIFGHT 0	WEIGHT 28	FBG 0	FBG 28	GROUP	FOOD(0-28)	WATER(0-28)		OGTT	0min	15min	30min	60min	90min	120min	AUC
CON	30.68	31.37	4.6	4.4	CON	38.55	25.6		CON	5.6	10.8	11.6	11.4	11.5	10.4	20.95
	30.4	31.35	4.9	4.8		38.74	26.6			5	9.1	10.9	9.2	9.5	9.4	18.3
	30.32	31.49	4.9	4.6		39.81	26.5			4.5	8.5	9.7	10.3	9.9	7.4	17.4
	32.51	32.94	4.3	4.6		39.64	27.2			5.2	8.3	14.9	10.8	10.4	8	20.85
	29.15	32.63	5	4.5	T2DM	41.19	30.5			5.7	9.6	11.6	11.8	11.4	10.5	21.325
	30.17	31.79	4.9	4.6		43.86	29.8		T2DM	9.3	27.2	29.9	28.6	25.2	24.8	51.125
	30.93	31.51	3.9	4.5		42.04	32.5			10.9	25.1	27	25.4	24.7	18.6	44.575
	29.38	30.43	4.3	4.8		42.47	30.4			8	27.1	29.9	28.5	26.6	26	51.325
T2DM	26.19	25.72	15.6	11.9	SUC	40.94	29.6			9.5	31.1	31.1	30.7	26.7	25	53.45
	25.97	25.69	9.7	9.2		42.81	30.5			8.2	28.9	33.3	28.2	21.4	24.3	52
	26.65	26.29	8.2	9.7		42.88	30.6		SUC	8.8	25.8	29.9	29.5	27.9	26	52.275
	26.51	25.83	9.5	9.8		41.28	29.8			9.9	27.6	30	26.4	24.4	20	47.275
	28.56	27.4	8	9.5	MOG	40.56	30.5			7.1	23.1	26.2	27.3	28.5	25.1	47.9
	28.3	26.32	9.7	9.7		42.2	30			8.6	25.5	33.3	30.2	26.9	24	53.45
	27.19	27.84	9.7	11.8		41.36	29.8			11.9	22.5	30.4	30.4	28.5	26.6	54.275
	28.56	25.69	8	9.7		40.05	31.2		MOG	7.2	18.1	26.8	26.1	25.7	23.3	46.425
SUC	29.32	28.14	8.8	8.8	ST	40.61	31.6			11.9	23.4	27.3	29.9	25.9	26.2	52.15
	28.33	28.3	8.5	7.4		40.92	30.2			8.4	18.1	30.6	27.2	27.3	20	47.8
	27.45	28.81	9.9	9.9		41.34	29.8			8.3	20.5	26.7	30.5	27.1	24.7	50.65
	26.49	25.05	7.4	7.8		41.84	31			9.2	20.4	28	27.1	25.9	23.3	48.275
	26.45	28.14	8.6	8.6	TGS	39.96	30.6		ST	7.5	20.3	27.2	30.7	22.4	18.1	47.55
	27.56	27.05	11.9	11.9		40.82	31.2			7.3	19.9	26.4	30.1	24.4	17.3	46.25
	28.09	27.6	7.3	7.8		40.9	29.6			7.4	19.4	31.7	27.4	21.1	19.9	48.2
	29.32	26.96	9	7.4		42.69	29.6			7.5	24.2	31.1	27.5	30.2	25.1	50.6
MOG	28.63	27.62	7.2	7.5	ERT	40.6	30.5			9.4	22.3	28.9	29.5	29.5	26.1	51.975
	27.25	29.96	7	8.5		40.27	29.5		TGS	13.4	18.9	26.7	27.7	22.3	24.7	49.825
	30.85	28.15	11.9	8.8		41.72	30.4			7.3	17.1	26.9	26.2	24.9	22.3	46.075
	27.76	30.9	8	7.8		41.95	30.8			9.8	25.4	30.4	30.1	29.4	25.5	52.975
	27.25	28.37	8.6	8.6						10.8	24.2	30.8	26.3	22.5	19.9	47.775
	28.92	27.96	8.4	7.8						10	20.1	32.6	33.2	33.3	25.5	56.45
	28.05	27.67	8.3	8.1					ERT	7.7	33.3	27.9	28.5	23	20.4	47.45
	27.89	27.64	11	10.7						7.4	22.1	22.4	22.6	19.3	17.7	38.85
ST	28.33	27.72	8.9	8.5						8.8	28.9	28.9	24.9	23.9	23.9	47.275
	28.52	26.84	10.3	7.9						10.2	28.7	30.3	30.5	29.8	28.3	54.725
	24.92	29.37	11.6	9.3						12.5	30.6	28.9	24.9	23.9	23.9	48.2
	29.42	28.77	8.3	10.9
	28.57	27.78	7.8	8.5
	28.61	27.9	8.5	7.8
	28.78	28.19	8	8.4
	29.08	29.63	8.4	8
TGS	28.75	28.56	7.3	9.8
	27.94	27.49	9.8	8.3
	28.99	30.62	8.3	10.8
	30.2	29.47	10.8	10
	27.5	30.02	10	7.5
	28.43	29.5	10	10
	28.33	27.38	7	7.9
	28.9	29.1	8	7.4
ERT	30.01	29.72	8.6	7.7
	29.32	29.73	11.1	8.8
	29.65	29.07	9.1	7.5
	28.93	29	8.4	7.8
	29.3	27.11	7.8	7.7
	27.89	29.91	7	10.4
	26.59	25.36	11.3	8.5
	27.43	27.51	8.6	11.5

## Sheet: Intestinal indexes
GROUP	v	c	vc	FITC	CELL	IFN-Y	IL-10	IL-1B	SIGA	TNF-A
CON	696.09	74.71	9.32	8.97	406	189.24	10.96	22.31	7.37	74.85
	626.96	86.76	7.23	14.42	488	192.28	10.35	18.45	6.89	98.91
	704.89	93.37	7.55	10.42	370	184.66	9.83	21.42	6.69	94.33
T2DM	392.08	91.17	4.3	59.77	221	258.14	8	35.53	3.26	169.76
	227.56	117.59	1.94	61.15	263	242.33	7.9	31.35	4.5	137.21
	212.4	113.29	1.87	49.88	285	244.98	7.52	32.08	4.27	158.2
SUC	478.05	92.02	5.2	58.07	212	236.8	9.07	24.56	5.44	130.95
	515.63	92.98	5.55	54.75	282	231.27	9.88	26.82	5.44	150.14
	491.05	99.97	4.91	45.22	263	219.39	8.77	27.08	4.94	145.87
MOG	457.73	84.47	5.42	35.01	415	229.67	8.64	29.76	5.48	135.6
	543.65	72.49	7.5	41.59	364	206.26	8.44	29.82	4.84	131.11
	613.82	82.84	7.41	44.47	432	221.11	9.29	28.46	5.14	133.23
ST	418.75	107.79	3.88	49	358	209.72	8.76	27.74	5.3	158.21
	334.94	91.32	3.67	45.15	436	218.96	8.09	28.5	5.45	123.65
	438.21	100.62	4.35	52.44	365	198.36	8.47	24.29	5.98	129.6
TGS	493.6	96.58	5.11	50.11	214	198.73	8.92	28.6	5.42	144.32
	580.35	88.83	6.53	40.62	207	208.09	8.61	24.23	5.88	140.09
	410.33	108.94	3.77	45.67	201	209.4	9.41	25.31	5.4	136.49
ERT	496.2	116.15	4.27	44.9	453	231.52	8.92	25.46	5.96	157.25
	397.79	88.56	4.49	38.07	374	230.98	9.55	23.81	5.33	126.4
	267.44	90.97	2.94	48.3	407	237.81	9.62	22.95	6.52	150.26

## Sheet: mRNA expression
GROUP	OCCLUDIN	CLAUDIN	MUC2	MUC4	ZO-1	PI3K	AKT	TNF-a	NF-kB
CON	1.21	0.936904	0.998742	1.0328	1.16592	1.00216	0.939193	0.947191	0.946132
	0.97	1.02466	0.975753	0.976898	0.892707	1.03044	1.03993	1.06743	1.01394
	0.85	1.04211	1.02614	0.990591	0.960778	0.968362	1.02386	0.989059	1.0424
T2DM	0.34	0.474848	0.439055	0.322492	0.442127	0.660994	0.490914	1.94712	2.345
	0.36	0.447653	0.453515	0.349108	0.437512	0.662638	0.593446	2.33098	2.07015
	0.52	0.492402	0.384522	0.367377	0.517084	0.612193	0.663549	2.08403	2.37185
SUC	0.77	0.555066	0.552178	0.452273	0.566399	0.717491	0.55201	1.99969	2.92298
	0.67	0.574354	0.371396	0.555364	0.633809	0.670484	0.576588	2.29155	2.49261
	0.66	0.67852	0.456762	0.468958	0.660919	0.671258	0.532314	2.51112	2.14484
MOG	0.82	0.76708	0.55361	0.588324	0.560732	0.839978	0.852759	1.69696	1.65966
	0.81	0.666909	0.55759	0.595456	0.655204	0.81147	0.866165	1.34284	2.08732
	0.75	0.581021	0.575376	0.562799	0.695753	0.870621	0.851436	1.43436	1.8048
ST	0.66	0.682641	0.559371	0.59977	0.645772	0.652676	0.474357	1.60961	2.26517
	0.71	0.714311	0.533139	0.590571	0.593284	0.746131	0.582222	1.44332	1.71935
	0.62	0.74431	0.469323	0.544126	0.5965	0.756415	0.440613	1.59141	1.83656
TGS	0.73	0.541509	0.414092	0.502772	0.43778	0.658505	0.488263	2.23687	2.16289
	0.62	0.588285	0.428634	0.453704	0.533014	0.669541	0.534342	2.10977	2.32323
	0.65	0.461047	0.351591	0.468799	0.589548	0.704389	0.377075	2.11888	2.21093
ERT	0.62	0.574428	0.514719	0.543341	0.536867	0.41307	0.247821	2.36279	1.94396
	0.79	0.584241	0.550204	0.582732	0.632018	0.529294	0.324631	2.01328	1.94577
	0.82	0.684962	0.564876	0.600079	0.595184	0.492289	0.326333	2.03687	2.16996

## Sheet: Protein expression
GROUP	MUC2	Occludin	PI3K	AKT	NF-kb
CON	0.92763	1.06906	1.07473	0.863694	0.92369
	0.885619	1.04622	0.961794	1.01274	0.947349
	1.18675	0.884722	0.963475	1.12356	1.12896
T2DM	0.286134	0.594159	0.523153	0.463241	3.10728
	0.52569	0.759898	0.460242	0.586174	3.00123
	0.321215	0.409728	0.515174	0.523789	2.25397
SUC	0.602579	0.71151	0.622453	0.643584	2.56311
	0.481584	0.599519	0.601689	0.716534	2.22639
	0.803672	0.886499	0.723956	0.73169	2.12772
MOG	0.561241	1.00046	0.697546	0.792639	1.11583
	0.790407	0.863168	0.708346	0.910585	1.1592
	0.868936	1.09027	0.698308	0.768171	1.43223
ST	0.637401	0.791572	0.695435	0.799528	1.03585
	0.64231	0.624211	0.679882	0.872864	1.23179
	0.840753	0.600323	0.549052	0.660696	1.56108
TGS	0.387792	0.287425	0.609074	0.779688	1.08514
	0.421622	0.377344	0.587756	0.583674	1.80173
	0.402796	0.441252	0.597984	0.734936	1.78843
ERT	0.24481	0.236221	0.597891	0.613497	1.10863
	0.368641	0.422506	0.64316	0.726127	2.80216
	0.468624	0.419096	0.640912	0.802542	1.1762
WB-data
MUC2	Area	Mean	Min	Max	IntDen	RawIntDen		MUC2			OCC-1	Area	Mean	Min	Max	IntDen	RawIntDen		OCC-1
1	3705	82.248	0	185	304727	304727		1	1.69954		1	1512	87.635	2	170	132504	132504		1	0.772352
2	3705	31.548	0	137	116885	116885		2	0.524235		2	1512	54.113	0	131	81819	81819		2	0.429255
3	3705	69.757	0	196	258448	258448		3	1.104		3	1512	66.268	5	136	100197	100197		3	0.514036
4	3705	75.92	0	200	281282	281282		4	1.02827		4	1512	74.423	2	171	112528	112528		4	0.722788
5	3705	87.336	0	206	323579	323579		5	1.1678		5	1512	79.976	2	183	120923	120923		5	0.571878
6	3705	61.526	0	148	227954	227954		6	0.710485		6	1512	28.771	1	79	43502	43502		6	0.207653
7	3705	35.987	0	143	133330	133330		7	0.448522		7	1512	23.264	0	65	35175	35175		7	0.17066
actin	Area	Mean	Min	Max	IntDen	RawIntDen					actin	Area	Mean	Min	Max	IntDen	RawIntDen
1	2145	83.59	15	255	179300	179300					1	1350	127.081	10	212	171559	171559
2	2145	103.945	19	255	222963	222963					2	1350	141.19	9	215	190607	190607
3	2145	109.138	21	255	234101	234101					3	1350	144.387	12	217	194922	194922
4	2145	127.529	19	255	273550	273550					4	1350	115.323	6	219	155686	155686
5	2145	129.177	33	255	277084	277084					5	1350	156.629	17	224	211449	211449
6	2145	149.577	42	255	320843	320843					6	1350	155.181	18	234	209494	209494
7	2145	138.585	45	255	297265	297265					7	1350	152.676	13	237	206112	206112
MUC2-2	Area	Mean	Min	Max	IntDen	RawIntDen		MUC2-2			OCC-2	Area	Mean	Min	Max	IntDen	RawIntDen		OCC-2
1	2500	119.258	6	202	298145	298145		1	1.62257		1	1325	100.234	1	237	132810	132810		1	0.755848
2	2500	87.281	6	188	218203	218203		2	0.963131		2	1325	90.851	0	220	120378	120378		2	0.548994
3	2500	59.074	0	145	147686	147686		3	0.882324		3	1325	52.703	4	123	69831	69831		3	0.433128
4	2500	110.148	5	207	275370	275370		4	1.44813		4	1325	87.176	7	215	115508	115508		4	0.623602
5	2500	110.332	5	213	275830	275830		5	1.17679		5	1325	76.398	0	191	101227	101227		5	0.450966
6	2500	78.064	5	148	195161	195161		6	0.772465		6	1325	50.199	1	118	66514	66514		6	0.272615
7	2500	56.092	1	149	140230	140230		7	0.675397		7	1325	45.713	0	112	60570	60570		7	0.305243
actin	Area	Mean	Min	Max	IntDen	RawIntDen					actin	Area	Mean	Min	Max	IntDen	RawIntDen
1	2100	87.5	1	220	183749	183749					1	1674	104.964	2	222	175710	175710
2	2100	107.884	5	225	226556	226556					2	1674	130.986	10	228	219270	219270
3	2100	79.706	2	225	167383	167383					3	1674	96.311	7	227	161225	161225
4	2100	90.55	3	227	190156	190156					4	1674	110.649	10	229	185227	185227
5	2100	111.615	3	225	234391	234391					5	1674	134.09	11	226	224467	224467
6	2100	120.308	3	219	252647	252647					6	1674	145.75	15	223	243985	243985
7	2100	98.87	3	221	207626	207626					7	1674	118.538	7	223	198432	198432
MUC2-3	Area	Mean	Min	Max	IntDen	RawIntDen		MUC2-3			OCC-3	Area	Mean	Min	Max	IntDen	RawIntDen		OCC-3
1	2214	187.785	1	249	415755	415755		1	2.17428		1	1430	97.76	0	217	139797	139797		1	0.639174
2	2214	58.8	0	117	130183	130183		2	0.588507		2	1430	39.63	0	107	56671	56671		2	0.296011
3	2214	152.112	2	246	336777	336777		3	1.47243		3	1430	93.05	6	197	133061	133061		3	0.640458
4	2214	127.1	0	248	281399	281399		4	1.592		4	1430	107.72	3	231	154039	154039		4	0.787678
5	2214	165.331	8	255	366042	366042		5	1.54037		5	1430	63.317	0	188	90544	90544		5	0.433708
6	2214	78.475	0	226	173744	173744		6	0.737973		6	1430	51.361	0	149	73446	73446		6	0.318786
7	2214	90.973	1	229	201415	201415		7	0.858579		7	1430	49.692	0	153	71059	71059		7	0.302779
actin	Area	Mean	Min	Max	IntDen	RawIntDen					actin	Area	Mean	Min	Max	IntDen	RawIntDen
1	1653	115.678	2	230	191215	191215					1	1995	109.632	1	229	218715	218715
2	1653	133.823	4	237	221209	221209					2	1995	95.964	1	236	191449	191449
3	1653	138.368	7	240	228722	228722					3	1995	104.14	1	243	207759	207759
4	1653	106.932	0	239	176758	176758					4	1995	98.026	1	247	195561	195561
5	1653	143.759	2	239	237633	237633					5	1995	104.645	1	248	208767	208767
6	1653	142.428	0	252	235434	235434					6	1995	115.485	1	248	230393	230393
7	1653	141.918	5	255	234591	234591					7	1995	117.639	1	243	234689	234689
MUC2-1		MUC2-2		MUC2-3							OCC-1		OCC-2		OCC-3
1	1.69954	1	1.62257	1	2.17428	1	1.83213				1	0.772352	1	0.755848	1	0.639174	1	0.722458
2	0.524235	2	0.963131	2	0.588507						2	0.429255	2	0.548994	2	0.296011
3	1.104	3	0.882324	3	1.47243						3	0.514036	3	0.433128	3	0.640458
4	1.02827	4	1.44813	4	1.592						4	0.722788	4	0.623602	4	0.787678
5	1.1678	5	1.17679	5	1.54037						5	0.571878	5	0.450966	5	0.433708
6	0.710485	6	0.772465	6	0.737973						6	0.207653	6	0.272615	6	0.318786
7	0.448522	7	0.675397	7	0.858579						7	0.17066	7	0.305243	7	0.302779
MUC2											OCC
1	0.92763	0.885619	1.18675								1	1.06906	1.04622	0.884722
2	0.286134	0.52569	0.321215								2	0.594159	0.759898	0.409728
3	0.602579	0.481584	0.803672								3	0.71151	0.599519	0.886499
4	0.561241	0.790407	0.868936								4	1.00046	0.863168	1.09027
5	0.637401	0.64231	0.840753								5	0.791572	0.624211	0.600323
6	0.387792	0.421622	0.402796								6	0.287425	0.377344	0.441252
7	0.24481	0.368641	0.468624								7	0.236221	0.422506	0.419096
NF-KB-1	Area	Mean	Min	Max	IntDen	RawIntDen		NF-KB-1			pi3k-1	Area	Mean	Min	Max	IntDen	RawIntDen		pi3k-1			akt-2	Area	Mean	Min	Max	IntDen	RawIntDen		akt-2
1	1512	78.649	0	233	118917	118917		1	0.582798		1	1404	118.506	3	233	166382	166382		1	1.78527		1	2516	109.983	6	214	276716	276716		1	1.10533
2	1512	125.756	0	229	190143	190143		2	1.96052		2	1404	132.444	4	229	185952	185952		2	0.869028		2	2516	75.294	2	217	189439	189439		2	0.592842
3	1512	117.713	0	236	177982	177982		3	1.61718		3	1404	137.697	7	226	193326	193326		3	1.03398		3	2516	110.23	6	222	277339	277339		3	0.823639
4	1512	90.554	0	242	136918	136918		4	0.704025		4	1404	135.475	7	236	190207	190207		4	1.15872		4	2516	110.85	5	230	278899	278899		4	1.0144
5	1512	79.944	0	223	120875	120875		5	0.653566		5	1404	152.588	8	243	214234	214234		5	1.15521		5	2516	123.362	2	232	310380	310380		5	1.02321
6	1512	94.487	0	209	142864	142864		6	0.684661		6	1404	118.505	2	244	166381	166381		6	1.01175		6	2516	115.988	2	237	291825	291825		6	0.997822
7	1512	88.663	0	224	134058	134058		7	0.699483		7	1404	127.849	5	251	179500	179500		7	0.993178		7	2516	83.986	0	243	211308	211308		7	0.785135
actin	Area	Mean	Min	Max	IntDen	RawIntDen					actin	Area	Mean	Min	Max	IntDen	RawIntDen					actin	Area	Mean	Min	Max	IntDen	RawIntDen
1	1708	119.464	3	221	204045	204045					1	1768	52.713	0	191	93197	93197					1	2176	115.049	0	247	250347	250347
2	1708	56.783	1	200	96986	96986					2	1768	121.028	2	255	213977	213977					2	2176	146.849	8	246	319544	319544
3	1708	64.436	0	195	110057	110057					3	1768	105.754	0	246	186973	186973					3	2176	154.744	5	245	336724	336724
4	1708	113.864	1	205	194479	194479					4	1768	92.847	0	251	164153	164153					4	2176	126.352	2	236	274941	274941
5	1708	108.283	3	213	184947	184947					5	1768	104.893	0	242	185450	185450					5	2176	139.402	2	240	303339	303339
6	1708	122.169	2	224	208664	208664					6	1768	93.014	0	228	164448	164448					6	2176	134.403	7	240	292462	292462
7	1708	112.209	5	221	191653	191653					7	1768	102.225	0	232	180733	180733					7	2176	123.684	5	230	269136	269136
NF-KB-2	Area	Mean	Min	Max	IntDen	RawIntDen		NF-KB-2			pi3k-2	Area	Mean	Min	Max	IntDen	RawIntDen		pi3k-2			akt-3	Area	Mean	Min	Max	IntDen	RawIntDen		akt-3
1	1653	81.306	0	237	134398	134398		1	0.597726		1	1539	186.058	75	255	286344	286344		1	1.59767		1	1638	124.811	4	209	204441	204441		1	1.4003
2	1653	145.145	0	255	239924	239924		2	1.89361		2	1539	134.491	65	206	206981	206981		2	0.764524		2	1638	86.788	0	215	142158	142158		2	0.643252
3	1653	124.3	2	255	205468	205468		3	1.40473		3	1539	156.958	64	250	241559	241559		3	0.999487		3	1638	99.23	2	216	162538	162538		3	0.884965
4	1653	100.126	0	255	165508	165508		4	0.731391		4	1539	170.031	55	255	261677	261677		4	1.17666		4	1638	111.668	3	216	182913	182913		4	0.952731
5	1653	99.826	0	250	165012	165012		5	0.777189		5	1539	166.018	62	255	255501	255501		5	1.12938		5	1638	94.443	2	220	154697	154697		5	0.820139
6	1653	105.099	0	255	173729	173729		6	1.13679		6	1539	157.457	57	255	242326	242326		6	0.976341		6	1638	96.183	0	224	157547	157547		6	0.910766
7	1653	132.506	2	255	219033	219033		7	1.76801		7	1539	134.452	39	255	206922	206922		7	1.06838		7	1638	115.141	0	226	188601	188601		7	0.98443
actin	Area	Mean	Min	Max	IntDen	RawIntDen					actin	Area	Mean	Min	Max	IntDen	RawIntDen					actin	Area	Mean	Min	Max	IntDen	RawIntDen
1	1984	113.331	2	239	224849	224849					1	1920	93.347	0	239	179226	179226					1	1943	75.141	0	213	145998	145998
2	1984	63.862	0	224	126702	126702					2	1920	141.006	4	234	270732	270732					2	1943	113.741	2	216	220999	220999
3	1984	73.724	0	237	146269	146269					3	1920	125.877	3	240	241683	241683					3	1943	94.527	1	226	183666	183666
4	1984	114.058	0	238	226292	226292					4	1920	115.828	0	240	222390	222390					4	1943	98.81	0	228	191988	191988
5	1984	107.016	1	227	212319	212319					5	1920	117.829	3	243	226232	226232					5	1943	97.078	0	229	188623	188623
6	1984	77.028	1	223	152824	152824					6	1920	129.27	5	240	248198	248198					6	1943	89.029	0	223	172983	172983
7	1984	62.443	0	209	123887	123887					7	1920	100.874	1	236	193679	193679					7	1943	98.602	0	222	191584	191584
NF-KB-3	Area	Mean	Min	Max	IntDen	RawIntDen		NF-KB-3			pi3k-3	Area	Mean	Min	Max	IntDen	RawIntDen		pi3k-3			akt-4	Area	Mean	Min	Max	IntDen	RawIntDen		akt-4
1	1881	95.724	0	253	180057	180057		1	0.712313		1	1696	105.045	1	255	178157	178157		1	1.60046		1	1740	129.039	5	233	224527	224527		1	1.29608
2	1881	140.806	0	255	264856	264856		2	1.42213		2	1696	81.219	0	232	137747	137747		2	0.855773		2	1740	100.093	2	235	174162	174162		2	0.750168
3	1881	120.945	0	255	227498	227498		3	1.34247		3	1696	112.558	4	222	190899	190899		3	1.20259		3	1740	103.47	1	240	180038	180038		3	0.916999
4	1881	94.341	5	250	177456	177456		4	0.903659		4	1696	127.993	6	223	217076	217076		4	1.15998		4	1740	123.711	4	239	215258	215258		4	1.16534
5	1881	98.926	1	255	186080	186080		5	0.984957		5	1696	110.579	0	226	187542	187542		5	0.912049		5	1740	85.42	3	240	148630	148630		5	1.11707
6	1881	117.918	4	226	221804	221804		6	1.1284		6	1696	123.42	4	223	209320	209320		6	0.993333		6	1740	85.29	2	246	148404	148404		6	0.746969
7	1881	82.556	0	217	155288	155288		7	0.742121		7	1696	115.019	5	225	195072	195072		7	1.06464		7	1740	114.132	1	243	198590	198590		7	0.929276
actin	Area	Mean	Min	Max	IntDen	RawIntDen					actin	Area	Mean	Min	Max	IntDen	RawIntDen					actin	Area	Mean	Min	Max	IntDen	RawIntDen
1	2484	101.762	0	231	252778	252778					1	1650	67.464	0	255	111316	111316					1	1952	88.748	0	240	173236	173236
2	2484	74.975	0	218	186239	186239					2	1650	97.553	0	255	160962	160962					2	1952	118.936	0	248	232164	232164
3	2484	68.221	0	218	169462	169462					3	1650	96.206	1	255	158740	158740					3	1952	100.581	0	255	196334	196334
4	2484	79.056	4	210	196375	196375					4	1650	113.416	0	255	187137	187137					4	1952	94.63	0	249	184717	184717
5	2484	76.056	0	255	188922	188922					5	1650	124.622	1	255	205627	205627					5	1952	68.163	0	241	133054	133054
6	2484	79.132	0	255	196565	196565					6	1650	127.712	0	255	210725	210725					6	1952	101.78	0	246	198675	198675
7	2484	84.239	0	244	209249	209249					7	1650	111.047	0	255	183228	183228					7	1952	109.48	0	246	213704	213704
NF-KB-1		NF-KB-2		NF-KB-3							pi3k-1		pi3k-2		pi3k-3							akt-2		akt-4		akt-3
1	0.582798	1	0.597726	1	0.712313	1	0.630945				1	1.78527	1	1.59767	1	1.60046	1	1.66113				1	1.10533	1	1.29608	1	1.4379		1.27977
2	1.96052	2	1.89361	2	1.42213						2	0.869028	2	0.764524	2	0.855773						2	0.592842	2	0.750168	2	0.670329
3	1.61718	3	1.40473	3	1.34247						3	1.03398	3	0.999487	3	1.20259						3	0.823639	3	0.916999	3	0.936395
4	0.704025	4	0.731391	4	0.903659						4	1.15872	4	1.17666	4	1.15998						4	1.0144	4	1.16534	4	0.983082
5	0.653566	5	0.777189	5	0.984957						5	1.15521	5	1.12938	5	0.912049						5	1.02321	5	1.11707	5	0.845538
6	0.684661	6	1.13679	6	1.1284						6	1.01175	6	0.976341	6	0.993333						6	0.997822	6	0.746969	6	0.940549
7	0.699483	7	1.76801	7	0.742121						7	0.993178	7	1.06838	7	1.06464						7	0.785135	7	0.929276	7	1.02707
nf-kb											PI3K											AKT
1	0.92369	0.947349	1.12896								1	1.07473	0.961794	0.963475								1	0.863694	1.01274	1.12356
2	3.10728	3.00123	2.25397								2	0.523153	0.460242	0.515174								2	0.463241	0.586174	0.523789
3	2.56311	2.22639	2.12772								3	0.622453	0.601689	0.723956								3	0.643584	0.716534	0.73169
4	1.11583	1.1592	1.43223								4	0.697546	0.708346	0.698308								4	0.792639	0.910585	0.768171
5	1.03585	1.23179	1.56108								5	0.695435	0.679882	0.549052								5	0.799528	0.872864	0.660696
6	1.08514	1.80173	1.78843								6	0.609074	0.587756	0.597984								6	0.779688	0.583674	0.734936
7	1.10863	2.80216	1.1762								7	0.597891	0.64316	0.640912								7	0.613497	0.726127	0.802542
