# Supplementary material for: Comparative effects of different sugar substitutes: Mogroside V, stevioside, sucralose, and erythritol on intestinal health in a type 2 diabetes mellitus mouse
Source: Royal Society of Chemistry journal article supplement (doi:10.1039/d4fo04446k), 2025-01-01
Supplement: d4fo04446k3.pdf [file d4fo04446k3.pdf]

**Table S1.** The major composition of high fat diet

| high fat diet<br>Components | g      | kcal    | high fat diet | mass ratio<br>g% | energy ratio kcal% |
|-----------------------------|--------|---------|---------------|------------------|--------------------|
| casein                      | 258.45 | 1033.80 | protein       | 26               | 20                 |
| cysteine                    | 3.88   | 15.52   | carbohydrates | 26               | 20                 |
| maltodextrin                | 161.53 | 646.12  | fat           | 35               | 60                 |
| sucrose                     | 88.91  | 355.64  | total         |                  | 100                |
| cellulose                   | 64.61  | 0       | kcal/g        | 5.24             |                    |
| soybean oil                 | 32.31  | 290.79  |               |                  |                    |
| lard                        | 316.60 | 2849.40 |               |                  |                    |
| mineral<br>mixture M1002    | 12.92  | 0       |               |                  |                    |
| monocalcium<br>phosphate    | 16.80  | 0       |               |                  |                    |
| calcium<br>carbonate        | 7.11   | 0       |               |                  |                    |
| potassium<br>citrate        | 21.32  | 0       |               |                  |                    |
| vitamin<br>mixture V1001    | 12.92  | 51.68   |               |                  |                    |
| bitartrate                  | 2.58   | 0       |               |                  |                    |
| choline                     |        |         |               |                  |                    |
| edible blue dye             | 0.065  | 0       |               |                  |                    |
| total                       | 1000   | 5242.95 |               |                  |                    |

**Table S2.** The major composition of maintenance diet

| Maintenance Diet    |                                                 | Nutritional guarantees |             |
|---------------------|-------------------------------------------------|------------------------|-------------|
| Components          |                                                 |                        |             |
| Protein source      | soybean meal, fishmeal                          | Water%                 | $\leq 10.0$ |
| Fat source          | vegetable oil                                   | Crude protein%         | $\geq 18.0$ |
| Fiber source        | rice husk                                       | Crude fat%             | $\geq 4.0$  |
| Carbohydrate source | corn, secondary flour                           | Crude fiber%           | $\leq 5.0$  |
| Vitamins            | VA,VD,VE,VB1,VB2,VB6,p<br>antothenic acid, etc. | Crude ash%             | $\leq 8.0$  |
| Minerals            | monocalcium phosphate, etc.                     | Calcium%               | 1.0 ~ 1.8   |
|                     |                                                 | Phosphorus%            | 0.6 ~ 1.2   |

**Table S3.** Related gene primer sequences

| Gene                            | Forward nucleotide sequence primers (5'-3') | Reverse nucleotide sequence primers (5'-3') |
|---------------------------------|---------------------------------------------|---------------------------------------------|
| <i>Occludin</i>                 | GTGGATCCCCAGGAGGCTAT                        | CGGTCCATCTTTCTTCGGGT                        |
| <i>Claudin1</i>                 | GCTGTCATCGGGGGCATAAT                        | CACTAATGTCGCCAGACCTGAA                      |
| <i>ZO-1</i>                     | GCCAGCTTTAAGCCTCCAGA                        | TGGCTTCGCTTGAGGTTTCT                        |
| <i>MUC2</i>                     | CAATGAGACCTGGTGGCTGT                        | CCAGTGCAGTAGCAGTCACA                        |
| <i>MUC4</i>                     | CCTCCTCCTGCTACCTGTAAAT                      | CCATCGGTGATGCTTGTCT                         |
| <i>TNF-<math>\alpha</math></i>  | GTGGAAGTGGCAGAAGAGGCA                       | AGAGGGAGGCCATTTGGGAAC                       |
| <i>PI3K</i>                     | AGGCATACCCTAAACTATTCAGC                     | TGCATGGTTAAGCCAACATCC                       |
| <i>AKT</i>                      | ATGTGGATCAGCGAGAGTCC                        | GCAGCGGATGATAAAGGTGT                        |
| <i>NF-<math>\kappa</math>B</i>  | GGCCCCGATGAGTACTTGG A                       | CTTGTTGAGCTGCAAGGGATGC                      |
| <i><math>\beta</math>-actin</i> | GGCTGTATTCCCTCCATCG                         | CCAGTTGGTAACAATGCCATG                       |

**Table S4.** Group differences OPL-SD model parameter table

| Model                  | R <sup>2</sup> X | R <sup>2</sup> Y | Q <sup>2</sup> |
|------------------------|------------------|------------------|----------------|
| Pos CON <i>vs</i> T2DM | 0.683            | 0.991            | 0.806          |
| Neg CON <i>vs</i> T2DM | 0.649            | 0.995            | 0.836          |
| Pos T2DM <i>vs</i> SUC | 0.56             | 0.94             | 0.738          |
| Neg T2DM <i>vs</i> SUC | 0.616            | 0.998            | 0.745          |
| Pos T2DM <i>vs</i> MOG | 0.682            | 0.998            | 0.892          |
| Neg T2DM <i>vs</i> MOG | 0.673            | 0.998            | 0.894          |
| Pos T2DM <i>vs</i> ST  | 0.618            | 0.998            | 0.828          |
| Neg T2DM <i>vs</i> ST  | 0.646            | 0.997            | 0.824          |
| Pos T2DM <i>vs</i> TGS | 0.652            | 0.998            | 0.697          |
| Neg T2DM <i>vs</i> TGS | 0.399            | 0.97             | 0.729          |
| Pos T2DM <i>vs</i> ERT | 0.652            | 0.992            | 0.751          |
| Neg T2DM <i>vs</i> ERT | 0.603            | 0.997            | 0.722          |

Note: CON group, control group; T2DM group, type 2 diabetes mellitus group; SUC group, sucrose group; MOG group, mogroside V group; ST group, stevioside group; TGS group, sucralose/4,1',6'-trichlorogalactosucrose group; ERT group, erythritol group. Pos, Positive mode; Neg, Negative mode.

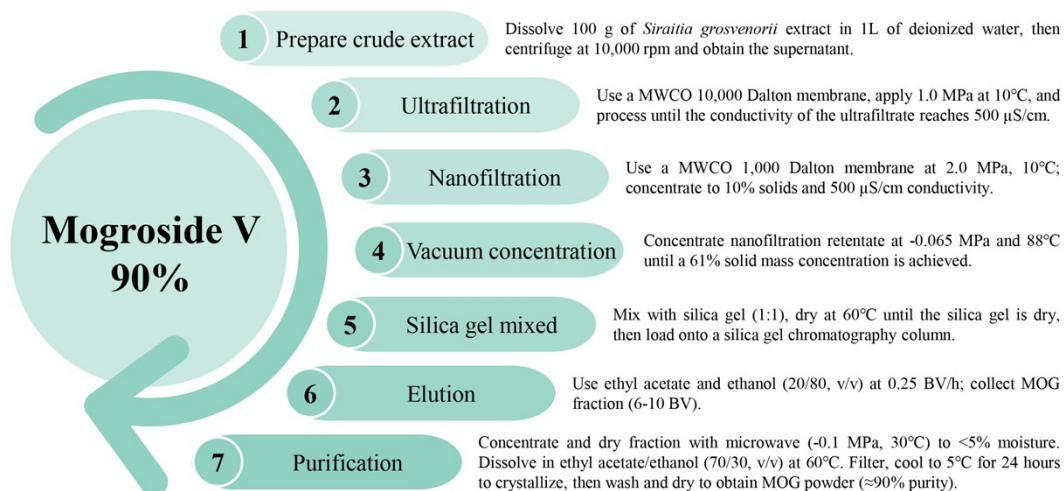

**Figure S1. Mogroside V 90% Process Flow Diagram**

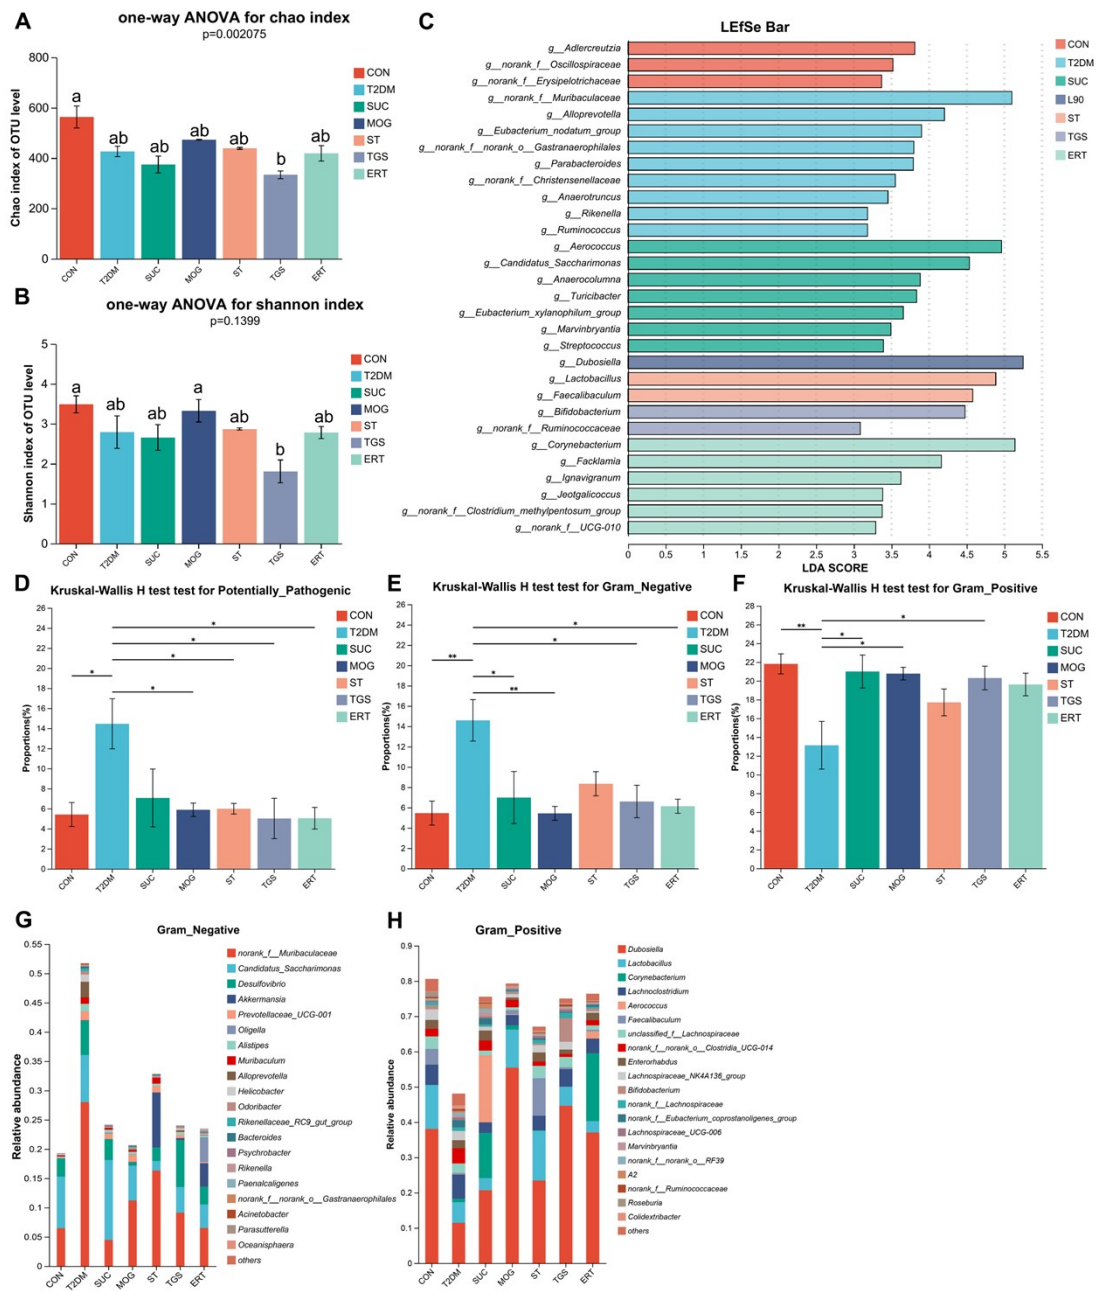

**Figure S2.** The effect of different sucrose substitutes on alpha indexes and bugbase analysis of gut microbiota in T2DM mice. **(A)** Chao index. **(B)** Shannon index. **(C)** LefSe discriminative bar plot. **(D)** Potentially\_Pathogenic. **(E)** Gram\_negative. **(F)** Gram\_positive. **(G)** Bugbase contribution (Gram\_Negative). **(H)** Bugbase contribution (Gram\_positive). CON group, control group; T2DM group, type 2 diabetes mellitus group; SUC group, sucrose group; MOG group, mogroside V group; ST group, stevioside group; TGS group, sucralose/4,1',6'-trichlorogalactosucrose group; ERT group, erythritol group. \* $p < 0.05$ . \*\* $p < 0.01$ . LefSe, linear discriminant analysis effect size.

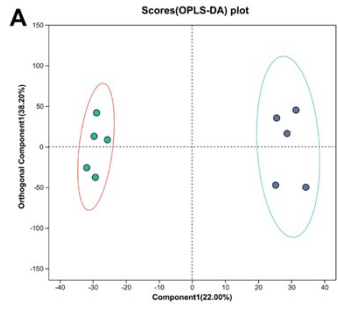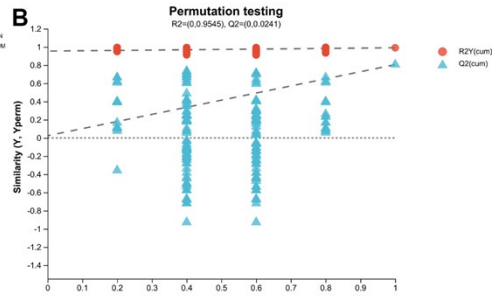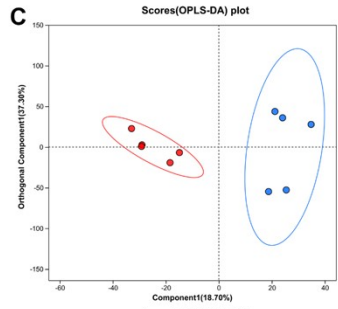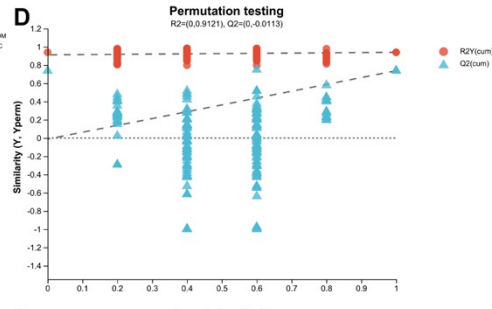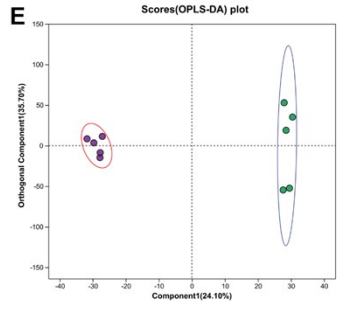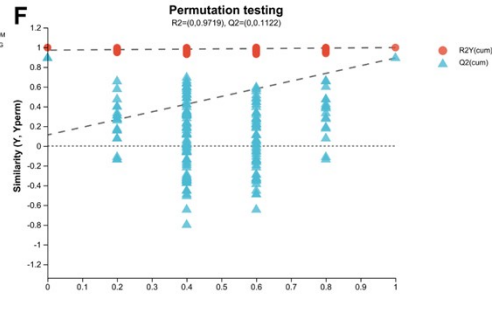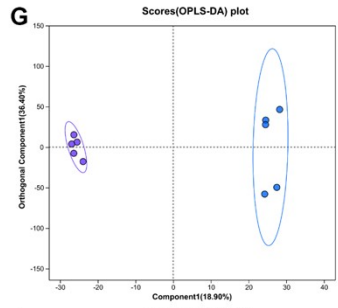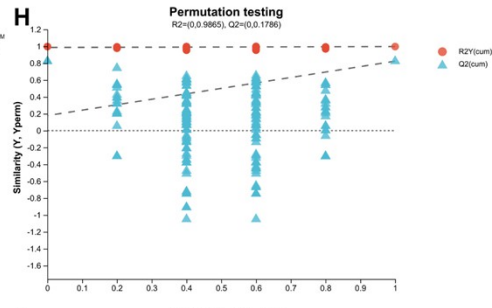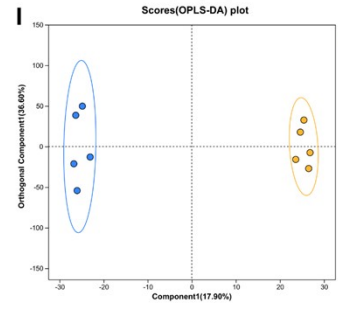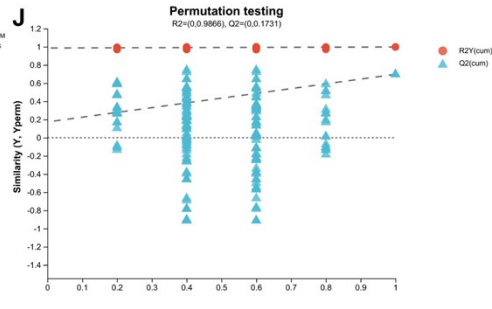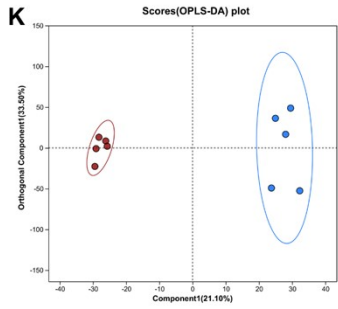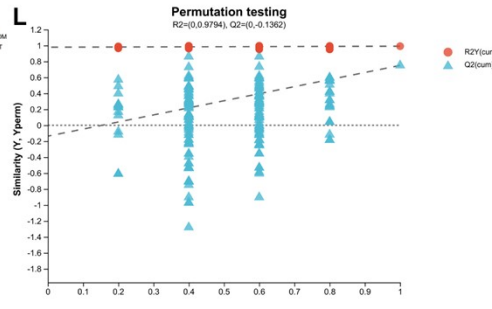

**Figure S3.** The effect of various sugar substitutes on the OPLS-DA model of cationic colonic contents in T2DM mice. OPLS-DA score plots **(A)** CON vs. T2DM. **(C)** T2DM vs. SUC. **(E)** T2DM vs. MOG. **(G)** T2DM vs. ST. **(I)** T2DM vs. TGS. **(K)** T2DM vs. ERT. 200 substitution test chart **(B)** CON vs. T2DM. **(D)** T2DM vs. SUC. **(F)** T2DM vs. MOG. **(H)** T2DM vs. ST. **(J)** T2DM vs. TGS. **(L)** T2DM vs. ERT. CON group, control group; T2DM group, type 2 diabetes mellitus group; SUC group, sucrose group; MOG group, mogroside V group; ST group, stevioside group; TGS group, sucralose/4,1',6'-trichlorogalactosucrose group; ERT group, erythritol group.



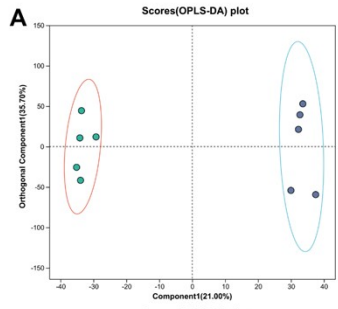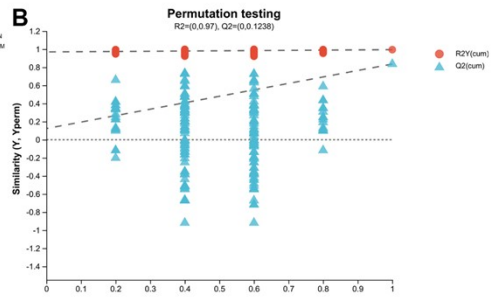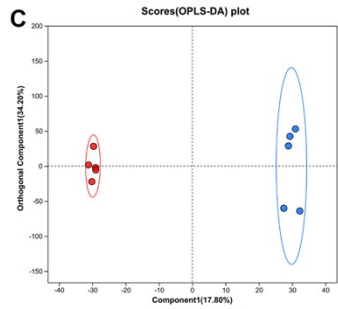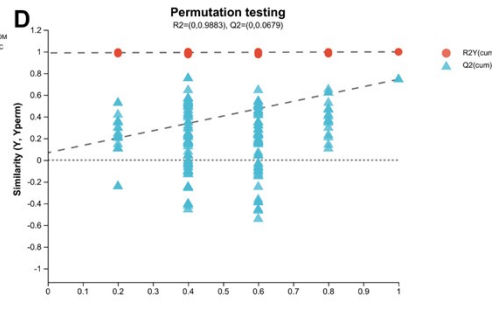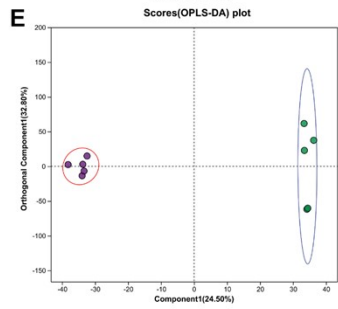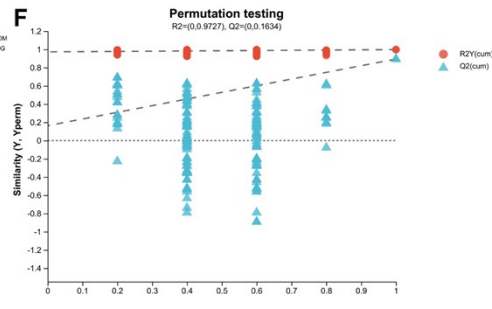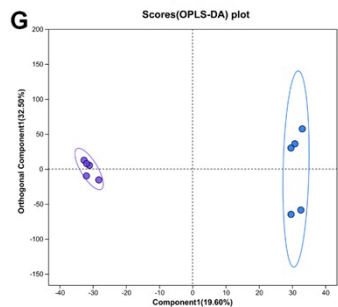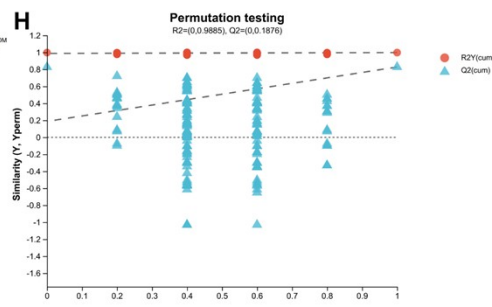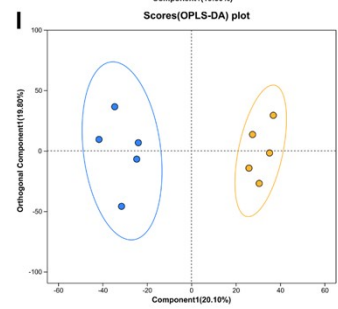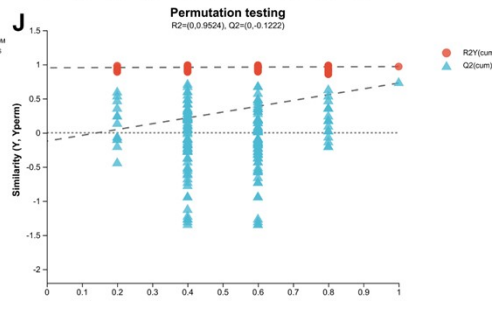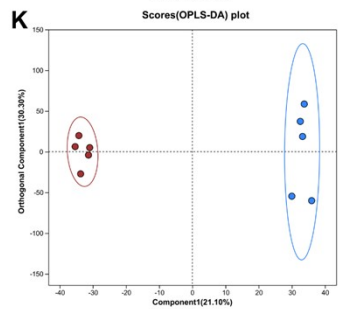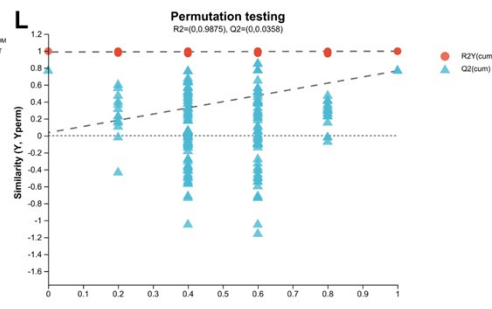

**Figure S4.** The effect of various sugar generations on OPLS-DA model of anions colonic contents in T2DM mice. OPLS-DA score plots **(A)** CON vs. T2DM. **(C)** T2DM vs. SUC. **(E)** T2DM vs. MOG. **(G)** T2DM vs. ST. **(I)** T2DM vs. TGS. **(K)** T2DM vs. ERT. 200 substitution test charts **(B)** CON vs. T2DM. **(D)** T2DM vs. SUC. **(F)** T2DM vs. MOG. **(H)** T2DM vs. ST. **(J)** T2DM vs. TGS. **(L)** T2DM vs. ERT. CON group, control group; T2DM group, type 2 diabetes mellitus group; SUC group, sucrose group; MOG group, mogroside V group; ST group, stevioside group; TGS group, sucralose/4,1',6'-trichlorogalactosucrose group; ERT group, erythritol group.
